# Supplementary material for: Efficacy and Safety of PD-1/PD-L1 Checkpoint Inhibitors versus Anti-PD-1/PD-L1 Combined with Other Therapies for Tumors: A Systematic Review
Source: MDPI journal article supplement (doi:10.3390/cancers15030682), 2023-01-22
Supplement: s1 [file s1]

## **Supplementary data**

### **Efficacy and Safety of PD-1/PD-L1 Checkpoint Inhibitors versus Anti-PD-1/PD-L1 Combined with Other Therapies for Tumors: A Systematic Review**

**Table S1** Search strategy

#1 ("Programmed Cell Death 1 Receptor"[Mesh]) OR (((((((((((PD-1 Protein[Title/Abstract]) OR (PD 1 Protein[Title/Abstract])) OR (PD-1 Receptor[Title/Abstract])) OR (PD 1 Receptor[Title/Abstract])) OR (Receptor, PD-1[Title/Abstract])) OR (Antigens, CD279[Title/Abstract])) OR (CD279 Antigens[Title/Abstract])) OR (CD279 Antigen[Title/Abstract])) OR (Antigen, CD279[Title/Abstract])) OR (PD1 Receptor[Title/Abstract])) OR (Receptor, PD1[Title/Abstract])) OR (Programmed Cell Death Protein 1[Title/Abstract])) OR (Programmed Cell Death 1 Protein[Title/Abstract]))

#2 ("Immune Checkpoint Inhibitors"[Mesh]) OR (((((((((((((((((((((((Checkpoint Inhibitors, Immune[Title/Abstract]) OR (Immune Checkpoint Inhibitor[Title/Abstract])) OR (Checkpoint Inhibitor, Immune[Title/Abstract])) OR (Immune Checkpoint Blockers[Title/Abstract])) OR (Checkpoint Blockers, Immune[Title/Abstract])) OR (Immune Checkpoint Blockade[Title/Abstract])) OR (Checkpoint Blockade, Immune[Title/Abstract])) OR (Immune Checkpoint Inhibition[Title/Abstract])) OR (Checkpoint Inhibition, Immune[Title/Abstract])) OR (PD-L1 Inhibitors[Title/Abstract])) OR (PD L1 Inhibitors[Title/Abstract])) OR (PD-L1 Inhibitor[Title/Abstract])) OR (PD L1 Inhibitor[Title/Abstract])) OR (Programmed Death-Ligand 1 Inhibitors[Title/Abstract])) OR (Programmed Death Ligand 1 Inhibitors[Title/Abstract])) OR (PD-1-PD-L1 Blockade[Title/Abstract])) OR (Blockade, PD-1-PD-L1[Title/Abstract])) OR (PD 1 PD L1 Blockade[Title/Abstract])) OR (CTLA-4 Inhibitors[Title/Abstract])) OR (CTLA 4 Inhibitors[Title/Abstract])) OR (CTLA-4 Inhibitor[Title/Abstract])) OR (CTLA 4 Inhibitor[Title/Abstract])) OR (Cytotoxic T-Lymphocyte-Associated Protein 4 Inhibitors[Title/Abstract])) OR (Cytotoxic T Lymphocyte Associated Protein 4 Inhibitors[Title/Abstract])) OR (Cytotoxic T-Lymphocyte-Associated Protein 4 Inhibitor[Title/Abstract])) OR (Cytotoxic T Lymphocyte Associated Protein 4 Inhibitor[Title/Abstract])) OR (PD-1 Inhibitors[Title/Abstract])) OR (PD 1 Inhibitors[Title/Abstract])) OR (PD-1 Inhibitor[Title/Abstract])) OR (Inhibitor, PD-1[Title/Abstract])) OR (PD 1

Inhibitor[Title/Abstract])) OR (Programmed Cell Death Protein 1  
 Inhibitor[Title/Abstract])) OR (Programmed Cell Death Protein 1  
 Inhibitors[Title/Abstract]))

#3 (((((((Nivolumab[Title/Abstract]) OR (Pembrolizumab[Title/Abstract])) OR  
 (Cemiplimab[Title/Abstract])) OR (Toripalimab[Title/Abstract])) OR  
 (Cindilimab[Title/Abstract])) OR (Camrelizumab[Title/Abstract])) OR  
 (Atezolizumab[Title/Abstract])) OR (Avelumab[Title/Abstract])) OR  
 (Durvalumab[Title/Abstract]))

#4 #1 OR #2 OR #3

#5 ("Neoplasms"[Mesh]) OR (((((((((((Tumor[Title/Abstract]) OR  
 (Neoplasm[Title/Abstract])) OR (Tumors[Title/Abstract])) OR  
 (Neoplasia[Title/Abstract])) OR (Neoplasias[Title/Abstract])) OR  
 (Cancer[Title/Abstract])) OR (Cancers[Title/Abstract])) OR (Malignant  
 Neoplasm[Title/Abstract])) OR (Malignancy[Title/Abstract])) OR  
 (Malignancies[Title/Abstract])) OR (Malignant Neoplasms[Title/Abstract])) OR  
 (Neoplasm, Malignant[Title/Abstract])) OR (Neoplasms, Malignant[Title/Abstract]))  
 OR (Benign Neoplasms[Title/Abstract])) OR (Benign Neoplasm[Title/Abstract])) OR  
 (Neoplasms, Benign[Title/Abstract])) OR (Neoplasm, Benign[Title/Abstract]))

#6 #4 AND #5 filters: from 1000/1/1 - 2022/2/16

**Table S2** Baseline demographics and clinical characteristics

| Author                        | Study type                              | Region         | Male :<br>Female | Median follow-up, months  |       | Median age (range), years           |                  | ECAEs            | RECT         |
|-------------------------------|-----------------------------------------|----------------|------------------|---------------------------|-------|-------------------------------------|------------------|------------------|--------------|
|                               |                                         |                |                  | experimental :<br>control | total | experimental :<br>control           | total            |                  |              |
| Boyer 2021 <sup>15</sup>      | Randomized, double-blind                | 24 countries   | 393 : 175        | NR                        | 20.6  | 64(35-85) : 65(35-85)               | NR               | NCI-CTCAE v.4.0  | RECIST v.1.1 |
| D'Angelo 2018 <sup>16</sup>   | Open-label, non-comparative, randomised | USA            | 41 : 44          | 14.2 : 13.6               | NR    | 57.0 (27.0–81.0) : 56.0 (21.0–76.0) | NR               | NCI-CTCAE v.4.0  | RECIST v.1.1 |
| Ferrarotto 2020 <sup>17</sup> | Randomized                              | USA            | 28 : 1           | NR                        | 15.79 | NR                                  | NR               | NCI-CTCAE v.4.03 | RECIST v.1.1 |
| Ferris 2020 <sup>18</sup>     | Randomized, open-label                  | NR             | 411 : 76         | 6.3 : 7.6                 | NR    | 61.0 (23–81) : 59.0 (24–84)         | NR               | NCI-CTCAE v.4.03 | RECIST v.1.1 |
| Gettinger 2021 <sup>19</sup>  | Randomized, multicenter, open-label     | NR             | 169 : 83         | NR                        | 29.5  | 67.5 (41.8-83.4) : 68.1 (48.6-90.3) | 67.5 (41.8-90.3) | NCI-CTCAE v.4.03 | RECIST v.1.1 |
| Janjigian 2018 <sup>20</sup>  | Open-label, two-stage, multicohort      | USA and Europe | 90 : 21          | 22 : 24                   | NR    | 58(19-81) : 60(29-80)               | NR               | NCI-CTCAE v.4.0  | RECIST v.1.1 |

|                             |                                                                             |              |           |           |      |                             |            |                  |              |
|-----------------------------|-----------------------------------------------------------------------------|--------------|-----------|-----------|------|-----------------------------|------------|------------------|--------------|
| Kaseb 2022 <sup>21</sup>    | Single-centre, randomised, open-label                                       | USA          | 19 : 8    | NR        | 24.6 | 62 (53–72) : 64 (56–68)     | 64 (53–69) | NCI-CTCAE v.4.0  | RECIST v.1.1 |
| Kelley 2021 <sup>22</sup>   | Randomized, open-label                                                      | 9 countries  | 157 : 22  | NR        | NR   | 66(26-86) : 64.5(32-89)     | NR         | NCI-CTCAE v.4.03 | RECIST v.1.1 |
| Kelly 2019 <sup>23</sup>    | Randomized, multicenter, open-label                                         | 6 countries  | 39 : 12   | 9.2 : 3.5 | NR   | 64.0 (27–78) : 60.0 (29–79) | NR         | NCI-CTCAE v.4.0  | RECIST v.1.1 |
| Long 2018 <sup>24</sup>     | Multicentre, open-label, randomised                                         | Australia    | 48 : 12   | 14:17     | 17   | 59 (53–68) : 63 (52–74)     | NR         | NCI-CTCAE v.4.0  | RECIST v.1.1 |
| Long 2019 <sup>25</sup>     | International, randomised, placebo-controlled, double-blind, parallel-group | 23 countries | 423 : 283 | NR        | 12.4 | 64 (52–72) : 63 (53.5–72)   | 64 (53–72) | NR               | RECIST v.1.1 |
| Omuro 2017 <sup>26</sup>    | Exploratory cohorts                                                         | USA          | 11 : 9    | NR        | NR   | 57 (37–68) : 58.5 (42–73)   | NR         | NCI-CTCAE v.4.0  | RANO         |
| O'Reilly 2019 <sup>27</sup> | Multicenter, randomized, open-label                                         | 6 countries  | 34 : 31   | NR        | 3.2  | 60.0 (37-81) : 62.0 (40-78) | 61 (37-81) | NCI-CTCAE v.4.03 | RECIST v.1.1 |

|                                |                                                                   |                                                                   |           |    |      |                                        |    |                         |              |
|--------------------------------|-------------------------------------------------------------------|-------------------------------------------------------------------|-----------|----|------|----------------------------------------|----|-------------------------|--------------|
| Paz-Ares 2021 <sup>27</sup>    | Randomized,<br>open-label                                         | North<br>America,<br>Europe,<br>Asia and<br>other 10<br>countries | 527 : 265 | NR | 54.8 | 64 (26–84) :<br>64 (27–85)             | NR | NR                      | NR           |
| Planchard 2020 <sup>29</sup>   | Randomized,<br>open-label,<br>multicenter<br>study                | 26 countries                                                      | 188 : 103 | NR | NR   | 62.5 (26–81) :<br>63.0 (19–83)         | NR | NR                      | RECIST v.1.1 |
| Powles 2020 <sup>30</sup>      | Open-label,<br>multicentre,<br>randomised,<br>controlled          | 23 countries                                                      | 505 : 183 | NR | 41.2 | 68 (60–73) :<br>67 (60–73)             | NR | NCI-<br>CTCAE<br>v.4.03 | RECIST v.1.1 |
| Ready 2019 <sup>31</sup>       | Randomized,<br>multicenter,<br>open-label                         | 8 countries                                                       | 147 : 96  | NR | NR   | 65.0 (41–91) :<br>63.0 (29–83)         | NR | NCI-<br>CTCAE<br>v.4.0  | RECIST v.1.1 |
| Scherpereel 2019 <sup>32</sup> | Multicentre,<br>open-label,<br>randomised,<br>non-<br>comparative | France                                                            | 100 : 25  | NR | 20.1 | 71.2 (48.1–88.1) :<br>72.3 (32.5–87.2) | NR | NCI-<br>CTCAE<br>v.4.0  | RECIST v.1.0 |
| Schoenfeld 2020 <sup>33</sup>  | Open label,<br>randomized                                         | NR                                                                | 18 : 11   | NR | NR   | 65.2 (32.5-78.4) :<br>64.4 (39.1-81.0) | NR | NCI-<br>CTCAE<br>v.4.0  | RECIST       |

|                            |                                                                 |                                            |            |           |      |                             |            |                  |              |
|----------------------------|-----------------------------------------------------------------|--------------------------------------------|------------|-----------|------|-----------------------------|------------|------------------|--------------|
| Sharma 2019 <sup>34</sup>  | Multicenter,<br>open-label,<br>multiarm                         | 8 countries                                | 135 : 47   | NR        | NR   | 64(39-83) : 65.5(31-85)     | NR         | NCI-CTCAE v.4.0  | RECIST v.1.1 |
| Singh 2021 <sup>35</sup>   | Randomized ,<br>noncomparative,<br>parallel group,<br>unblinded | NR                                         | 19 : 17    | NR        | NR   | NR                          | 61 (21-80) | NCI-CTCAE v.4.03 | RECIST v.1.1 |
| Siu 2018 <sup>36</sup>     | Randomized,<br>open-label,<br>multicenter,<br>global            | North America,<br>Europe and Asia Pacific  | 167 : 33   | 6.5 : 6.0 | NR   | 62 (26-81) : 62 (23-82)     | NR         | NR               | RECIST v.1.1 |
| Tawbi 2022 <sup>37</sup>   | Global, double-blind,<br>randomized                             | America, Europe, Australia and New Zealand | 416 : 298  | NR        | 13.2 | 63.0 (20–94) : 62.0 (21–90) | 63 (20–94) | NCI-CTCAE v.5.0  | RECIST v.1.1 |
| Wolchok 2021 <sup>38</sup> | Randomized                                                      | 5 countries                                | 408 : 222  | 57.5 : 36 | NR   | 61 (18-88) : 60 (25-90)     | NR         | NCI-CTCAE v.4.0  | RECIST v.1.1 |
| Zamarin 2020 <sup>39</sup> | Open-label,<br>randomized                                       | USA                                        | all female | NR        | NR   | 62(38-92) : 63(37-87)       | NR         | NCI-CTCAE v.4.0  | RECIST v.1.1 |
| Zimmer 2020 <sup>40</sup>  | Randomised,<br>double-blind,<br>placebo-controlled              | Germany                                    | 62 : 53    | NR        | 28.4 | 52 (45–59) : 57 (48–65)     | NR         | NCI-CTCAE v.4.0  | RECIST v.1.1 |

|                              |                                                          |                                           |           |           |      |                                        |                     |                         |              |
|------------------------------|----------------------------------------------------------|-------------------------------------------|-----------|-----------|------|----------------------------------------|---------------------|-------------------------|--------------|
| Eng 2019 <sup>41</sup>       | Multicentre,<br>open-label,<br>randomised,<br>controlled | 11 countries                              | 166 : 107 | NR        | 7.3  | 58 (51–67) :<br>56 (51–64)             | NR                  | NCI-<br>CTCAE<br>v.4.0  | RECIST v.1.1 |
| Gogas 2020 <sup>42</sup>     | International,<br>randomized,<br>open-label              | North<br>America,<br>Europe and<br>others | 270 : 176 | 7.1 : 7.2 | NR   | 66 (54-73) :<br>66 (55-73)             | NR                  | NCI-<br>CTCAE<br>v.4.0  | RECIST v.1.1 |
| Lee 2020 <sup>43</sup>       | Open-label,<br>multicentre,<br>multiarm                  | 7 countries                               | 103 : 16  | 6.6 : 6.7 | 12.4 | 60 (22–82) :<br>63 (23–85)             | NR                  | NCI-<br>CTCAE<br>v.4.0  | RECIST v.1.1 |
| McDermott 2018 <sup>44</sup> | Randomised                                               | NR                                        | 151 : 53  | NR        | 20.7 | 62 (32-88) :<br>61 (27-81)             | NR                  | NR                      | RECIST v.1.1 |
| Nayak 2020 <sup>45</sup>     | Multicenter,<br>open-label, two-<br>cohort               | NR                                        | 54 : 26   | NR        | NR   | 52 (42–59) :<br>55 (42–62)             | 53 (42–<br>60)      | NCI-<br>CTCAE<br>v.4.0  | RANO         |
| Taylor 2022 <sup>46</sup>    | Multicenter,<br>open-label,<br>randomized                | USA                                       | 69 : 7    | 6.4 : 9.2 | NR   | 58.0 (45.0–97.0) :<br>61.0 (38.0–83.0) | 60.5<br>(38-<br>97) | NCI-<br>CTCAE<br>v.4.03 | RECIST v.1.1 |
| Yarchoan 2021 <sup>47</sup>  | Randomised                                               | USA                                       | 29 : 48   | NR        | NR   | NR                                     | NR                  | NR                      | RECIST v.1.1 |
| Zhang 2020 <sup>48</sup>     | Randomized,<br>open-label,<br>multicenter                | USA                                       | 57 : 18   | NR        | NR   | 68 (36-83) :<br>65 (46-96)             | NR                  | NCI-<br>CTCAE<br>v.4.03 | RECIST v.1.1 |

|                                 |                                                   |              |           |             |      |                                     |            |                  |                 |
|---------------------------------|---------------------------------------------------|--------------|-----------|-------------|------|-------------------------------------|------------|------------------|-----------------|
| Altorki 2021 <sup>49</sup>      | Single-centre, open-label, randomised, controlled | USA          | 31 : 29   | NR          | 16.9 | 70.0 (64.2–74.0) : 71.0 (65.2–75.0) | NR         | NCI-CTCAE v.4.0  | RECIST v.1.1.13 |
| McBride 2020 <sup>50</sup>      | Single-center, randomized                         | USA          | NR        | NR          | 20.2 | 66(35-83) : 60.5(29-77)             | 63 (29-83) | NCI-CTCAE v.4.03 | RECIST v.1.1    |
| Papadopoulos 2019 <sup>51</sup> | Open-label, multicenter                           | NR           | NR        | NR          | 4.4  | NR                                  | 58 (31-79) | NCI-CTCAE v.4.03 | RECIST v.1.1    |
| Theelen 2019 <sup>52</sup>      | Multicenter, randomized                           | Netherlands  | 44 : 32   | NR          | 23.6 | NR                                  | 62 (35-78) | NCI-CTCAE v.4.0  | RECIST v.1.1    |
| Burtneess 2019 <sup>53</sup>    | Randomised, open-label                            | 37 countries | 474 : 108 | 13.0 : 11.5 | NR   | 61.0 (55.0–68.0) : 62.0 (56.0–68.0) | NR         | NCI-CTCAE v.4.0  | RECIST v.1.1    |
| Fang 2018 <sup>54</sup>         | Two single-arm                                    | China        | 92 : 24   | 10.2 : 9.9  | NR   | 44 (34–51) : 45 (38–52)             | NR         | NCI-CTCAE v.4.03 | RECIST v.1.1    |
| Galsky 2020 <sup>55</sup>       | Multicentre, randomised, placebo-controlled       | 35 countries | 618 : 195 | NR          | 11.8 | 69 (62–75) : 67 (62–74)             | NR         | NCI-CTCAE v.4.0  | RECIST v.1.1    |

|                              |                                                                                          |                   |           |             |      |                                |                |                         |              |
|------------------------------|------------------------------------------------------------------------------------------|-------------------|-----------|-------------|------|--------------------------------|----------------|-------------------------|--------------|
| Levy 2019 <sup>56</sup>      | Multicenter,<br>international,<br>randomised,<br>placebo-<br>controlled,<br>double-blind | USA and<br>Europe | 57 : 43   | 11.3 : 12.2 | NR   | 65 (39–82) :<br>66 (39–82)     | 65 (39–<br>82) | NCI-<br>CTCAE<br>v.4.0  | RECIST v.1.1 |
| Nie 2019 <sup>57</sup>       | Two-arm, open-<br>label                                                                  | China             | 37 : 24   | NR          | 14.9 | 26(18.3-31.8) :<br>28(23.5-32) | NR             | NCI-<br>CTCAE<br>v.4.0  | RRCML        |
| Powles 2021 <sup>58</sup>    | Randomised,<br>open-label                                                                | 21 countries      | 500 : 158 | NR          | 31.7 | 69 (62–75) :<br>68 (61–74)     | NR             | NCI-<br>CTCAE<br>v.4.0  | RECIST v.1.1 |
| Shitara 2020 <sup>59</sup>   | Randomized,<br>controlled,<br>partially blinded<br>interventional                        | 29 countries      | 375 : 138 | NR          | 29.4 | 62.0 (22-83) :<br>61.0 (20-83) | NR             | NCI-<br>CTCAE<br>v.4.0  | RECIST v.1.1 |
| Ueno 2019 <sup>60</sup>      | Non-<br>randomised,<br>multicentre,<br>open-label                                        | Janpan            | 32 : 28   | 8.2 : 5.1   | NR   | 67.5 (54–75) :<br>68 (60–71)   | NR             | NCI-<br>CTCAE<br>v.4.0  | RECIST v.1.1 |
| Gutierrez 2020 <sup>61</sup> | Open-label                                                                               | 7 countries       | NE*       | NR          | NR   | NR                             | 55-69          | NCI-<br>CTCAE<br>v.4.03 | RECIST v.1.1 |
| Spigel 2020 <sup>62</sup>    | Randomised                                                                               | NR                | 60 : 41   | NR          | 10   | 69 (49-82) :<br>68 (49-83)     | NR             | NCI-<br>CTCAE<br>v.4.03 | RECIST v.1.1 |

NCI-CTCAE: National Cancer Institute Common Terminology Criteria for Adverse Events. RECIST: Response Evaluation Criteria In Solid Tumors. RANO: Response Assessment in Neuro-Oncology. RRCML: Revised Response Criteria for Malignant Lymphomas (2014 Lugano classification). NR: not reported. NE: not estimate; \* The monotherapy group was described together with another group which we are not focused on in the baseline. ECAEs: Evaluation criteria of AEs. RECT: Response evaluation criteria in tumors.

**Table S3** Median survival ratio of OS based on tumor types

| subgroup and Author<br>(Year) | ES    | [95% Conf. Interval] |       | % Weight |
|-------------------------------|-------|----------------------|-------|----------|
| NSCLC                         |       |                      |       |          |
| Planchard 2020 <sup>29</sup>  | 1.150 | 1.025                | 1.290 | 3.55     |
| Paz-Ares 2021 <sup>28</sup>   | 1.089 | 1.016                | 1.168 | 3.66     |
| Boyer 2021 <sup>15</sup>      | 0.977 | 0.900                | 1.061 | 3.63     |
| Gettinger 2021 <sup>19</sup>  | 0.909 | 0.804                | 1.029 | 3.53     |
| Theelen 2019 <sup>52</sup>    | 2.092 | 1.671                | 2.620 | 3.16     |
| Subgroup, DL                  | 1.151 | 0.978                | 1.355 | 17.52    |
| SCLC                          |       |                      |       |          |
| Ready 2019 <sup>31</sup>      | 0.825 | 0.727                | 0.935 | 3.52     |
| Subgroup, DL                  | 0.825 | 0.727                | 0.935 | 3.52     |
| HNSCC                         |       |                      |       |          |
| Burtness 2019 <sup>53</sup>   | 0.872 | 0.804                | 0.946 | 3.63     |
| Siu 2018 <sup>36</sup>        | 1.267 | 1.100                | 1.458 | 3.48     |
| Taylor 2022 <sup>46</sup>     | 1.010 | 0.807                | 1.265 | 3.16     |
| Ferris 2020 <sup>18</sup>     | 0.855 | 0.783                | 0.935 | 3.62     |
| McBride 2020 <sup>50</sup>    | 0.979 | 0.760                | 1.261 | 3.03     |
| Subgroup, DL                  | 0.978 | 0.844                | 1.135 | 16.91    |
| genitourinary system          |       |                      |       |          |
| Zamarin 2020 <sup>39</sup>    | 1.289 | 1.060                | 1.568 | 3.27     |
| Galsky 2020 <sup>55</sup>     | 1.019 | 0.951                | 1.092 | 3.66     |
| Sharma 2019 <sup>34</sup>     | 0.747 | 0.646                | 0.864 | 3.46     |
| Powles 2020 <sup>30</sup>     | 1.144 | 1.062                | 1.233 | 3.65     |
| Powles 2021 <sup>58</sup>     | 1.090 | 1.010                | 1.176 | 3.64     |
| Zhang 2020 <sup>48</sup>      | 0.553 | 0.441                | 0.693 | 3.15     |
| Subgroup, DL                  | 0.955 | 0.821                | 1.110 | 20.83    |
| digestive system              |       |                      |       |          |

|                                |       |       |       |        |
|--------------------------------|-------|-------|-------|--------|
| Singh 2021 <sup>35</sup>       | 0.327 | 0.235 | 0.456 | 2.68   |
| Eng 2019 <sup>41</sup>         | 1.249 | 1.110 | 1.407 | 3.54   |
| O'Reilly 2019 <sup>27</sup>    | 0.861 | 0.675 | 1.098 | 3.08   |
| Shitara 2020 <sup>59</sup>     | 1.179 | 1.081 | 1.286 | 3.62   |
| Ueno 2019 <sup>60</sup>        | 2.962 | 2.299 | 3.814 | 3.03   |
| Kelley 2021 <sup>22</sup>      | 1.238 | 1.070 | 1.434 | 3.46   |
| Kelly 2019 <sup>23</sup>       | 2.706 | 2.056 | 3.560 | 2.94   |
| Janjigian 2018 <sup>20</sup>   | 0.774 | 0.643 | 0.932 | 3.31   |
| Subgroup, DL                   | 1.164 | 0.868 | 1.561 | 25.66  |
| recurrent                      |       |       |       |        |
| glioblastoma                   |       |       |       |        |
| Omuro 2017 <sup>26</sup>       | 0.885 | 0.564 | 1.387 | 2.17   |
| Nayak 2020 <sup>45</sup>       | 0.854 | 0.686 | 1.064 | 3.18   |
| Subgroup, DL                   | 0.860 | 0.706 | 1.047 | 5.35   |
| relapsed malignant             |       |       |       |        |
| pleural mesothelioma           |       |       |       |        |
| Scherpereel 2019 <sup>32</sup> | 1.336 | 1.121 | 1.592 | 3.35   |
| Subgroup, DL                   | 1.336 | 1.121 | 1.592 | 3.35   |
| melanoma                       |       |       |       |        |
| Wolchok 2021 <sup>38</sup>     | 1.954 | 1.807 | 2.113 | 3.64   |
| Subgroup, DL                   | 1.954 | 1.807 | 2.113 | 3.64   |
| metastatic sarcoma             |       |       |       |        |
| D'Angelo 2018 <sup>16</sup>    | 1.336 | 1.081 | 1.653 | 3.21   |
| Subgroup, DL                   | 1.336 | 1.081 | 1.653 | 3.21   |
| Overall, DL                    | 1.086 | 0.980 | 1.203 | 100.00 |

Tests of subgroup effect size = 1; Cochran's Q statistics for heterogeneity

NSCLC:  $z = 1.688$ ,  $P = 0.091$ ,  $I^2 = 91.5\%$ ; SCLC:  $z = -3.007$ ,  $P = 0.003$ ; HNSCC:  $z = -0.288$ ,  $P = 0.773$ ,  $I^2 = 84.0\%$ ; Genitourinary system:  $z = -0.603$ ,  $P = 0.546$ ,  $I^2 = 92.0\%$ ; Digestive system:  $z = 1.014$ ,  $P = 0.311$ ,  $I^2 = 95.9\%$ ; Recurrent glioblastoma:  $z = -1.500$ ,  $P = 0.134$ ,  $I^2 = 0.0\%$ ; Relapsed malignant pleural me:  $z = 3.240$ ,  $P = 0.001$ ; Melanoma:  $z = 16.813$ ,  $P = 0.000$ ; Metastatic sarcoma:  $z = 2.674$ ,  $P = 0.007$ ; Overall:  $z = 1.568$ ,  $P = 0.117$ ,  $I^2 = 95.2\%$ ; Between:  $P = 0.000$

**Table S4** Median survival ratio of PFS based on tumor types

| subgroup and Author<br>(Year) | ES    | [95% Conf. Interval] |       | % Weight |
|-------------------------------|-------|----------------------|-------|----------|
| NSCLC                         |       |                      |       |          |
| Levy 2019 <sup>56</sup>       | 0.725 | 0.596                | 0.882 | 2.70     |
| Planchard 2020 <sup>29</sup>  | 1.129 | 1.006                | 1.266 | 2.80     |
| Spigel 2020 <sup>62</sup>     | 1.033 | 0.850                | 1.255 | 2.70     |
| Paz-Ares 2021 <sup>28</sup>   | 1.214 | 1.133                | 1.302 | 2.84     |
| Boyer 2021 <sup>15</sup>      | 0.976 | 0.899                | 1.060 | 2.83     |
| Gettinger 2021 <sup>19</sup>  | 1.310 | 1.158                | 1.483 | 2.80     |
| Theelen 2019 <sup>52</sup>    | 3.474 | 2.774                | 4.349 | 2.66     |
| Subgroup, DL                  | 1.231 | 0.992                | 1.527 | 19.34    |
| SCLC                          |       |                      |       |          |
| Ready 2019 <sup>31</sup>      | 1.071 | 0.945                | 1.215 | 2.79     |
| Subgroup, DL                  | 1.071 | 0.945                | 1.215 | 2.79     |
| HNSCC                         |       |                      |       |          |
| Burtness 2019 <sup>53</sup>   | 2.130 | 1.964                | 2.311 | 2.83     |
| Siu 2018 <sup>36</sup>        | 1.053 | 0.914                | 1.212 | 2.78     |
| Taylor 2022 <sup>46</sup>     | 1.588 | 1.268                | 1.989 | 2.66     |
| McBride 2020 <sup>50</sup>    | 1.368 | 1.063                | 1.762 | 2.61     |
| Subgroup, DL                  | 1.490 | 1.006                | 2.205 | 10.87    |
| genitourinary system          |       |                      |       |          |
| Zamarin 2020 <sup>39</sup>    | 1.950 | 1.603                | 2.372 | 2.70     |
| McDermott 2018 <sup>44</sup>  | 1.918 | 1.672                | 2.200 | 2.78     |
| Sharma 2019 <sup>34</sup>     | 0.929 | 0.803                | 1.074 | 2.77     |
| Powles 2020 <sup>30</sup>     | 1.609 | 1.493                | 1.734 | 2.84     |
| Zhang 2020 <sup>48</sup>      | 1.375 | 1.097                | 1.724 | 2.65     |
| Subgroup, DL                  | 1.503 | 1.169                | 1.933 | 13.75    |
| digestive system              |       |                      |       |          |

|                                                            |       |       |       |       |
|------------------------------------------------------------|-------|-------|-------|-------|
| Kaseb 2022 <sup>21</sup>                                   | 2.078 | 1.425 | 3.030 | 2.35  |
| Singh 2021 <sup>35</sup>                                   | 0.710 | 0.510 | 0.989 | 2.45  |
| Eng 2019 <sup>41</sup>                                     | 0.985 | 0.874 | 1.109 | 2.80  |
| O'Reilly 2019 <sup>27</sup>                                | 1.000 | 0.784 | 1.275 | 2.62  |
| Shitara 2020 <sup>59</sup>                                 | 3.450 | 3.164 | 3.762 | 2.83  |
| Ueno 2019 <sup>60</sup>                                    | 3.000 | 2.329 | 3.864 | 2.61  |
| Yarchoan 2021 <sup>47</sup>                                | 1.952 | 1.533 | 2.484 | 2.63  |
| Lee 2020 <sup>43</sup>                                     | 1.647 | 1.376 | 1.971 | 2.73  |
| Kelley 2021 <sup>22</sup>                                  | 1.048 | 0.905 | 1.214 | 2.77  |
| Kelly 2019 <sup>23</sup>                                   | 1.125 | 0.855 | 1.480 | 2.56  |
| Janjigian 2018 <sup>20</sup>                               | 1.143 | 0.949 | 1.377 | 2.72  |
| Subgroup, DL<br>melanoma                                   | 1.464 | 1.011 | 2.119 | 29.06 |
| Long 2019 <sup>25</sup>                                    | 0.959 | 0.891 | 1.033 | 2.84  |
| Long 2018 <sup>24</sup>                                    | 5.308 | 4.121 | 6.836 | 2.61  |
| Gogas 2020 <sup>42</sup>                                   | 0.965 | 0.876 | 1.063 | 2.82  |
| Tawbi 2022 <sup>37</sup>                                   | 2.196 | 2.040 | 2.363 | 2.84  |
| Wolchok 2021 <sup>38</sup>                                 | 1.667 | 1.541 | 1.802 | 2.84  |
| Subgroup, DL<br>recurrent<br>glioblastoma                  | 1.758 | 1.158 | 2.669 | 13.94 |
| Omuro 2017 <sup>26</sup>                                   | 0.789 | 0.504 | 1.238 | 2.18  |
| Nayak 2020 <sup>45</sup>                                   | 2.867 | 2.303 | 3.570 | 2.66  |
| Subgroup, DL<br>relapsed malignant<br>pleural mesothelioma | 1.528 | 0.432 | 5.406 | 4.85  |
| Scherpereel 2019 <sup>32</sup>                             | 1.400 | 1.175 | 1.668 | 2.73  |
| Subgroup, DL<br>metastatic sarcoma                         | 1.400 | 1.175 | 1.668 | 2.73  |

|                             |       |       |       |        |
|-----------------------------|-------|-------|-------|--------|
| D'Angelo 2018 <sup>16</sup> | 2.412 | 1.950 | 2.983 | 2.68   |
| Subgroup, DL                | 2.412 | 1.950 | 2.983 | 2.68   |
| Overall, DL                 | 1.473 | 1.285 | 1.688 | 100.00 |

Tests of subgroup effect size = 1; Cochran's Q statistics for heterogeneity

NSCLC:  $z = 1.887$ ,  $P = 0.059$ ,  $I^2 = 95.6\%$ ; SCLC:  $z = 1.075$ ,  $P = 0.282$ ; HNSCC:  $z = 1.992$ ,  $P = 0.046$ ,  $I^2 = 96.1\%$ ; Genitourinary system:  $z = 3.176$ ,  $P = 0.001$ ,  $I^2 = 93.8\%$ ; Digestive system:  $z = 2.018$ ,  $P = 0.044$ ,  $I^2 = 97.9\%$ ; Melanoma:  $z = 2.650$ ,  $P = 0.008$ ,  $I^2 = 99.1\%$ ; Recurrent glioblastoma:  $z = 0.658$ ,  $P = 0.511$ ,  $I^2 = 96.1\%$ ; Relapsed malignant pleural me:  $z = 3.762$ ,  $P = 0.000$ ; Metastatic sarcoma:  $z = 8.117$ ,  $P = 0.000$ ; Overall:  $z = 5.564$ ,  $P = 0.000$ ,  $I^2 = 97.5\%$ ; Between:  $P = 0.000$

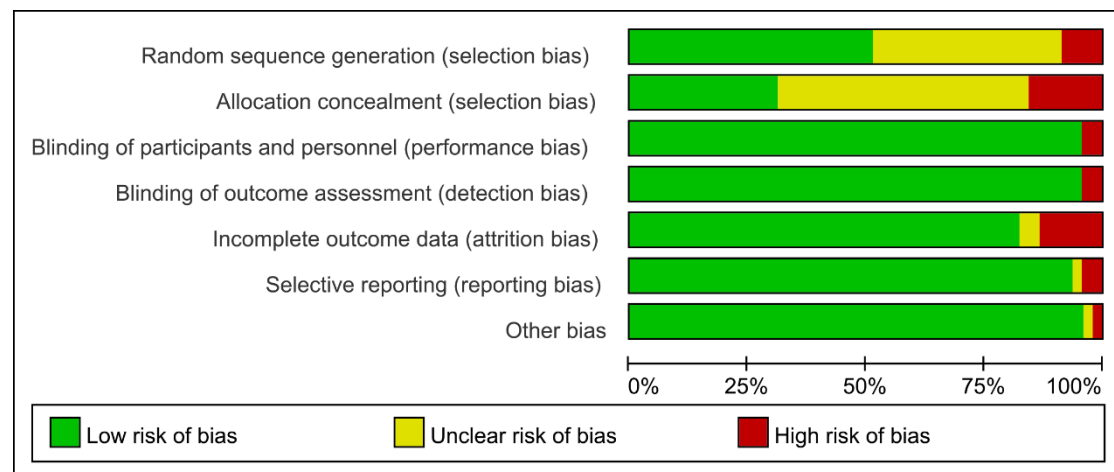

**Figure S1** Risk of bias graph: covers 45 studies on the risk of bias judgments.

|                   | Random sequence generation (selection bias) | Allocation concealment (selection bias) | Blinding of participants and personnel (performance bias) | Blinding of outcome assessment (detection bias) | Incomplete outcome data (attrition bias) | Selective reporting (reporting bias) | Other bias |
|-------------------|---------------------------------------------|-----------------------------------------|-----------------------------------------------------------|-------------------------------------------------|------------------------------------------|--------------------------------------|------------|
| Altorki 2021      | +                                           | ?                                       | +                                                         | +                                               | +                                        | +                                    | +          |
| Boyer 2021        | ?                                           | ?                                       | +                                                         | +                                               | +                                        | +                                    | +          |
| Burtneiss 2019    | +                                           | +                                       | +                                                         | +                                               | +                                        | +                                    | +          |
| Eng 2019          | +                                           | +                                       | +                                                         | +                                               | +                                        | +                                    | +          |
| Ferrarotto 2020   | +                                           | +                                       | +                                                         | +                                               | +                                        | +                                    | +          |
| Ferris 2020       | +                                           | +                                       | +                                                         | +                                               | ?                                        | +                                    | +          |
| Galsky 2020       | +                                           | +                                       | +                                                         | +                                               | +                                        | +                                    | +          |
| Gettinger 2021    | +                                           | +                                       | +                                                         | +                                               | +                                        | +                                    | +          |
| Gogas 2020        | +                                           | +                                       | +                                                         | +                                               | +                                        | +                                    | +          |
| Gutierrez 2020    | +                                           | +                                       | +                                                         | +                                               | +                                        | +                                    | +          |
| Janjigian 2018    | +                                           | +                                       | +                                                         | +                                               | +                                        | +                                    | +          |
| Kaseb 2022        | +                                           | +                                       | +                                                         | +                                               | +                                        | +                                    | +          |
| Kelley 2021       | ?                                           | ?                                       | +                                                         | +                                               | +                                        | +                                    | +          |
| Kelly 2019        | ?                                           | ?                                       | +                                                         | +                                               | +                                        | +                                    | +          |
| Lee 2020          | +                                           | +                                       | +                                                         | +                                               | +                                        | +                                    | +          |
| Levy 2019         | +                                           | +                                       | +                                                         | +                                               | +                                        | +                                    | +          |
| Long 2018         | +                                           | +                                       | +                                                         | +                                               | +                                        | +                                    | +          |
| Long 2019         | +                                           | +                                       | +                                                         | +                                               | +                                        | +                                    | +          |
| McBride 2020      | ?                                           | ?                                       | +                                                         | +                                               | +                                        | +                                    | +          |
| McDermott 2018    | ?                                           | ?                                       | +                                                         | +                                               | +                                        | +                                    | +          |
| Nayak 2020        | ?                                           | ?                                       | +                                                         | +                                               | +                                        | +                                    | +          |
| Nie 2019          | +                                           | ?                                       | +                                                         | +                                               | +                                        | +                                    | +          |
| O'Reilly 2019     | ?                                           | ?                                       | +                                                         | +                                               | +                                        | +                                    | +          |
| Omuro 2017        | ?                                           | ?                                       | +                                                         | +                                               | +                                        | +                                    | +          |
| Papadopoulos 2019 | ?                                           | ?                                       | +                                                         | +                                               | +                                        | +                                    | +          |
| Paz-Ares 2021     | ?                                           | ?                                       | +                                                         | +                                               | +                                        | +                                    | +          |
| Planchard 2020    | ?                                           | ?                                       | +                                                         | +                                               | +                                        | +                                    | +          |
| Powles 2020       | +                                           | +                                       | +                                                         | +                                               | +                                        | +                                    | +          |
| Powles 2021       | +                                           | +                                       | +                                                         | +                                               | +                                        | +                                    | +          |
| Ready 2019        | +                                           | ?                                       | +                                                         | +                                               | +                                        | +                                    | +          |
| Scherpereel 2019  | +                                           | +                                       | +                                                         | +                                               | +                                        | +                                    | +          |
| Schoenfeld 2020   | ?                                           | ?                                       | +                                                         | +                                               | ?                                        | +                                    | +          |
| Sharma 2019       | ?                                           | ?                                       | +                                                         | +                                               | +                                        | +                                    | +          |
| Shitara 2020      | +                                           | +                                       | +                                                         | +                                               | +                                        | +                                    | +          |
| Singh 2021        | ?                                           | ?                                       | +                                                         | +                                               | +                                        | +                                    | +          |
| Siu 2018          | +                                           | +                                       | +                                                         | +                                               | +                                        | +                                    | +          |
| Spigel 2020       | ?                                           | ?                                       | +                                                         | +                                               | +                                        | +                                    | +          |
| Tawbi 2022        | +                                           | ?                                       | +                                                         | +                                               | +                                        | +                                    | +          |
| Taylor 2022       | ?                                           | ?                                       | +                                                         | +                                               | +                                        | +                                    | ?          |
| Theelen 2019      | +                                           | ?                                       | +                                                         | +                                               | +                                        | +                                    | +          |
| Wolchok 2021      | ?                                           | ?                                       | +                                                         | +                                               | +                                        | +                                    | +          |
| Yarchoan 2021     | +                                           | +                                       | +                                                         | +                                               | +                                        | +                                    | +          |
| Zamarin 2020      | +                                           | ?                                       | +                                                         | +                                               | +                                        | +                                    | +          |
| Zhang 2020        | ?                                           | ?                                       | +                                                         | +                                               | +                                        | +                                    | +          |
| Zimmer 2020       | +                                           | +                                       | +                                                         | +                                               | ?                                        | +                                    | +          |

**Figure S2** Risk of bias summary: covers 45 studies on the risk of bias judgments.

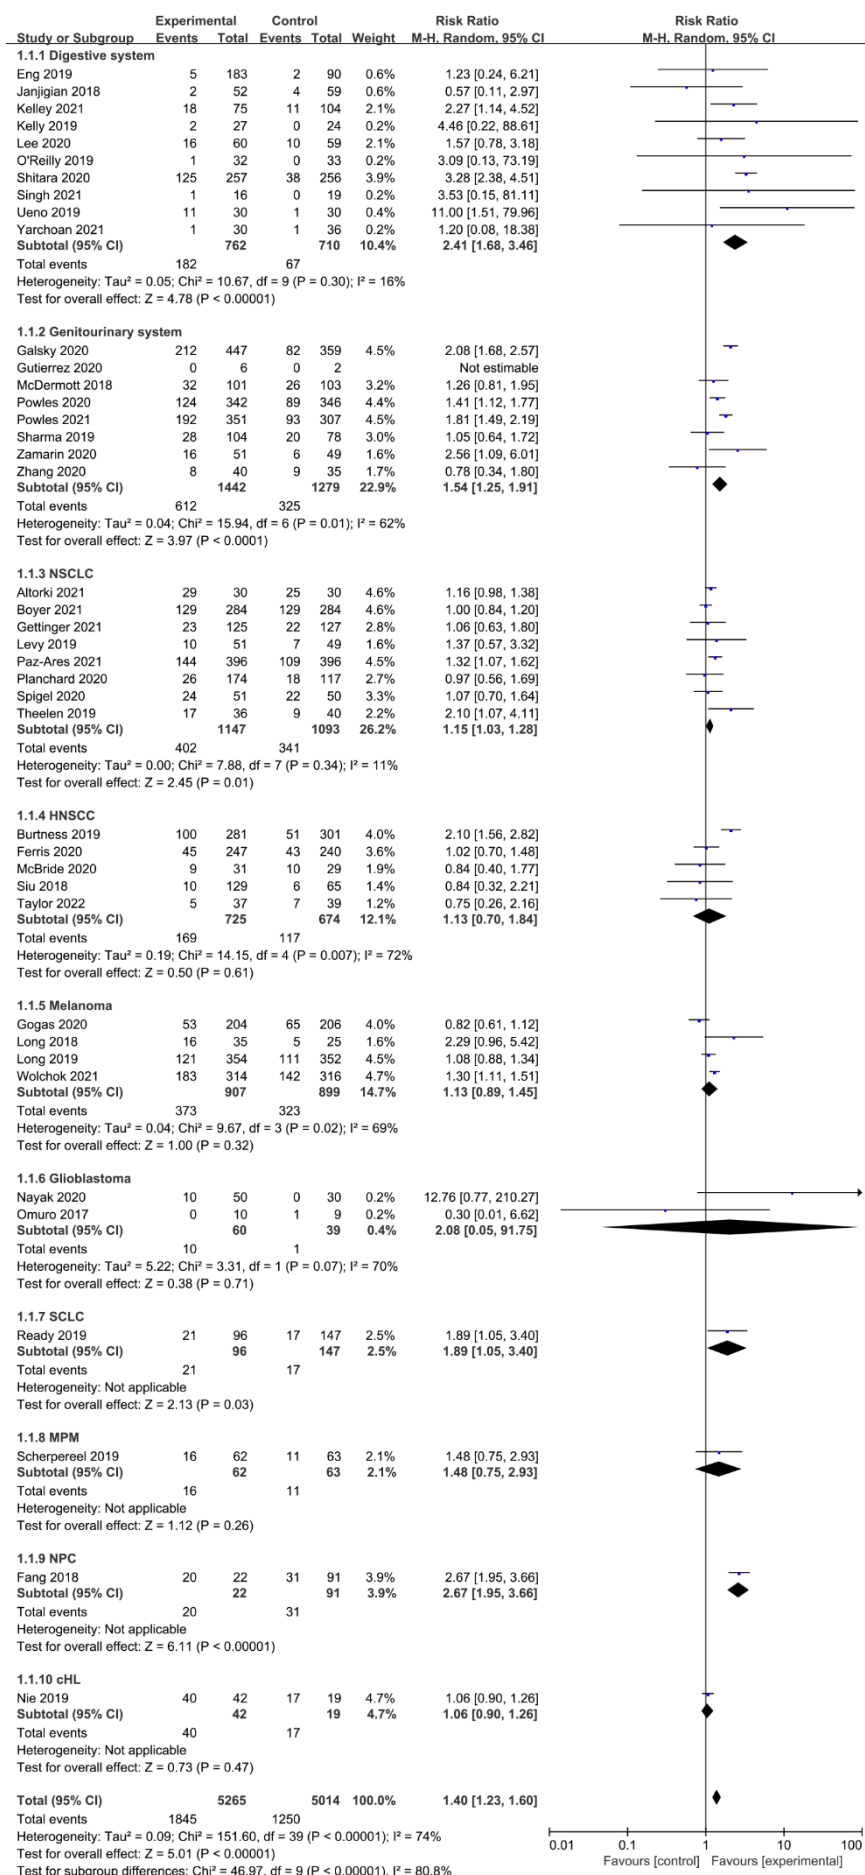

**Figure S3** Forest Plot of the Risk ratio of ORR based on tumor types: anti-PD-1/PD-L1 versus combination therapy (digestive system tumors, genitourinary system tumors, non-small cell lung cancer, head and neck squamous cell carcinoma, melanoma, glioblastoma, small cell lung cancer, malignant pleural mesothelioma, nasopharyngeal carcinoma, and classic Hodgkin's lymphoma)

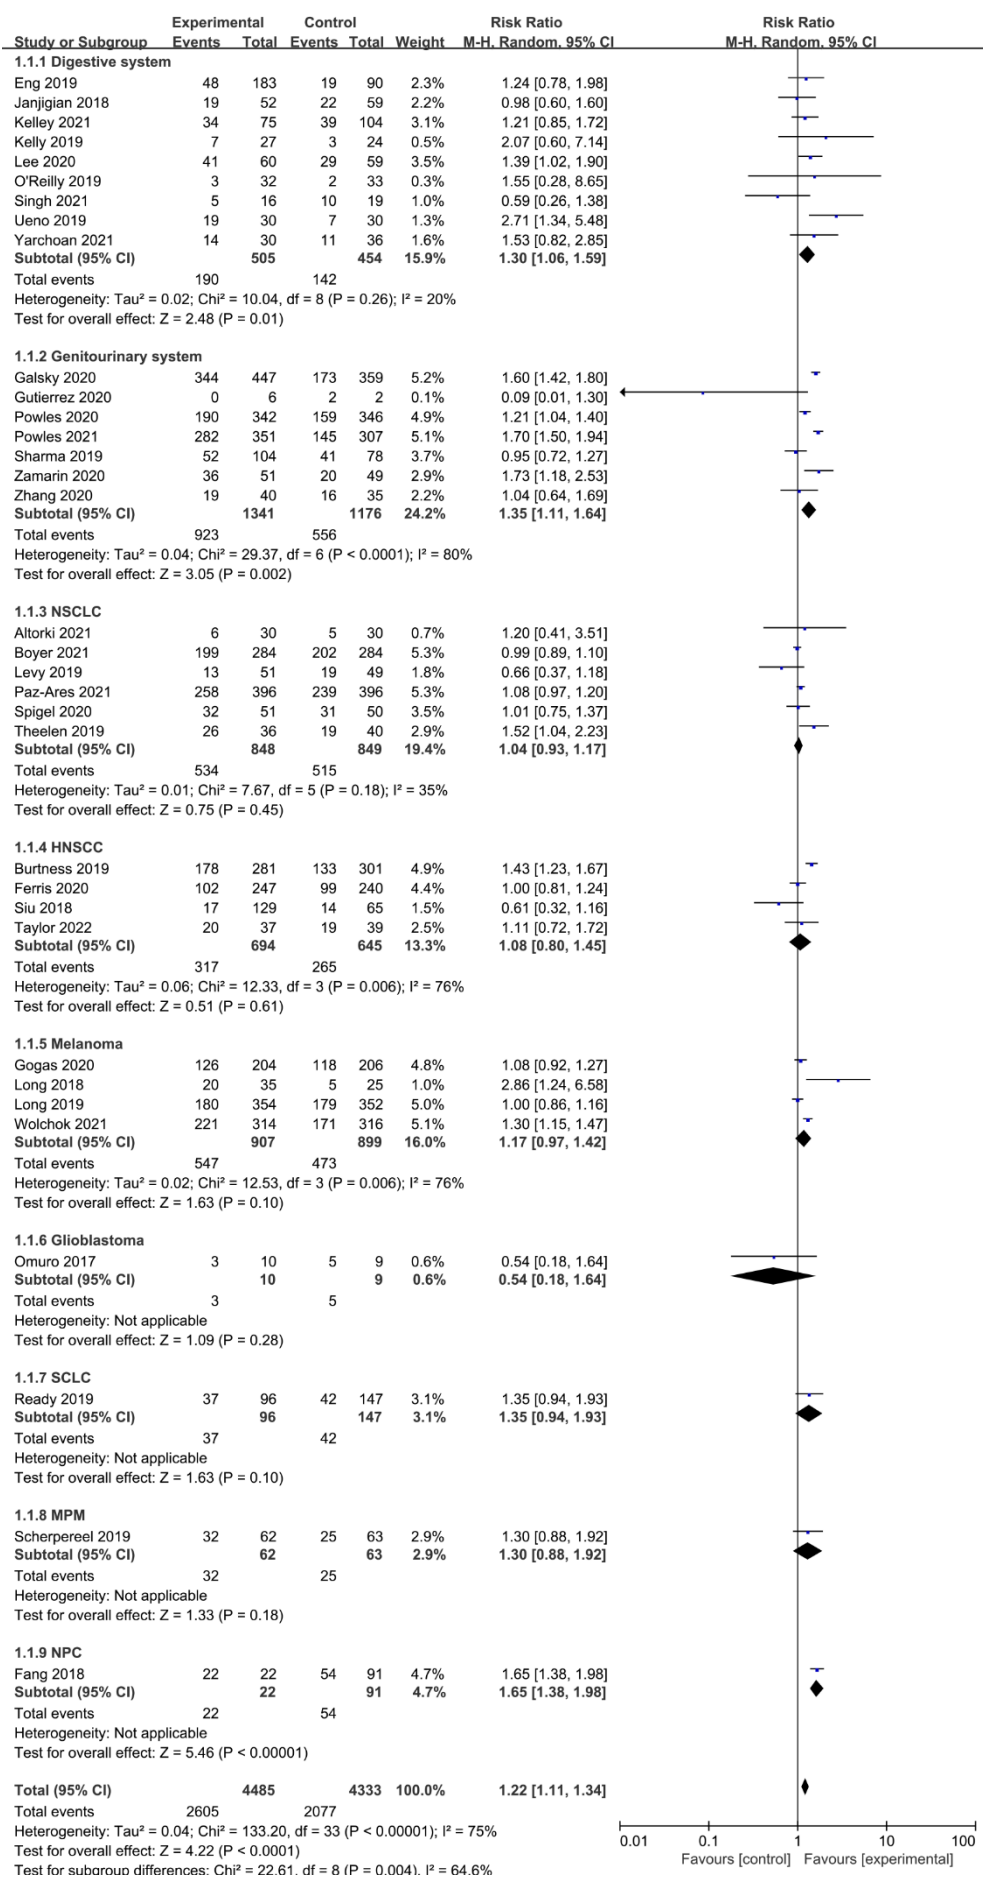

**Figure S4** Forest Plot of the Risk ratio of DCR based on tumor types: anti-PD-1/PD-L1 versus combination therapy (digestive system tumors, genitourinary system tumors, non-small cell lung cancer, head and neck squamous cell carcinoma, melanoma, glioblastoma, small cell lung cancer, malignant pleural mesothelioma, and nasopharyngeal carcinoma)

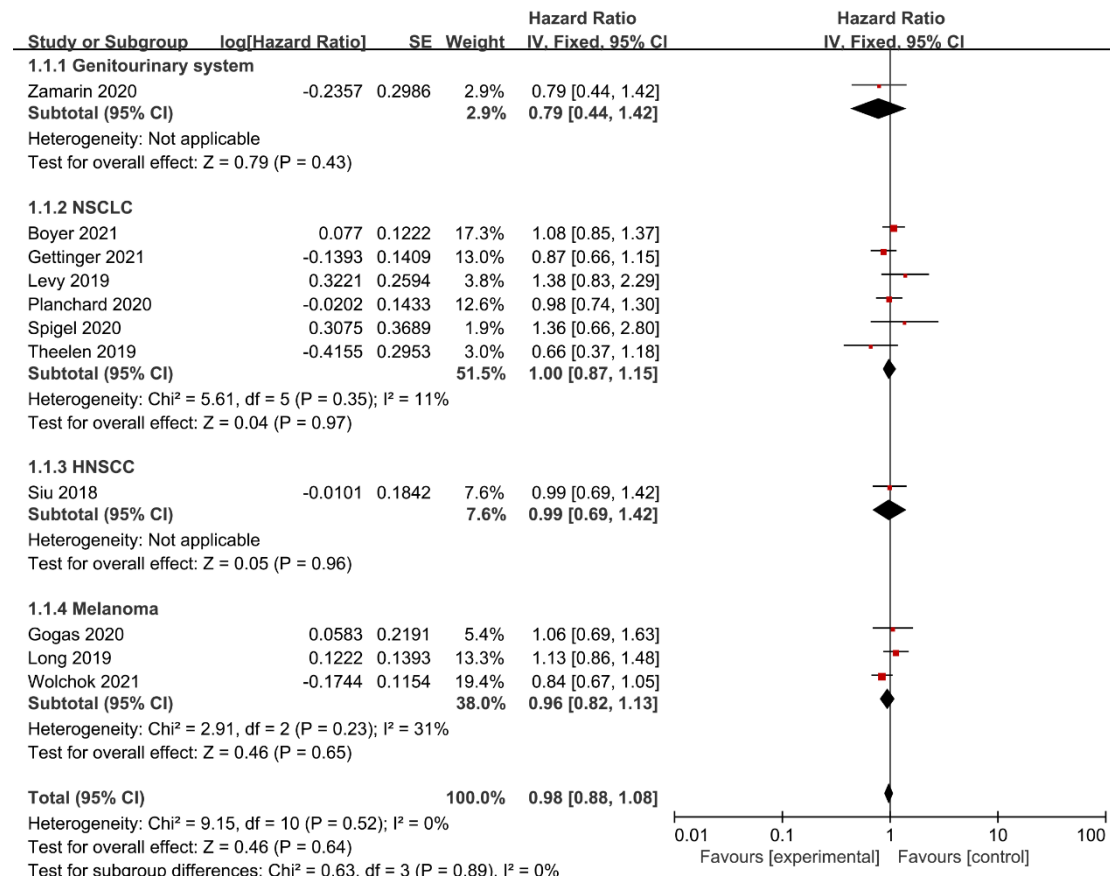

**Figure S5** Forest Plot of the Hazard ratio of OS based on tumor types: anti-PD-1/PD-L1 versus combination therapy (genitourinary system tumors, non-small cell lung cancer, head and neck squamous cell carcinoma, and melanoma)

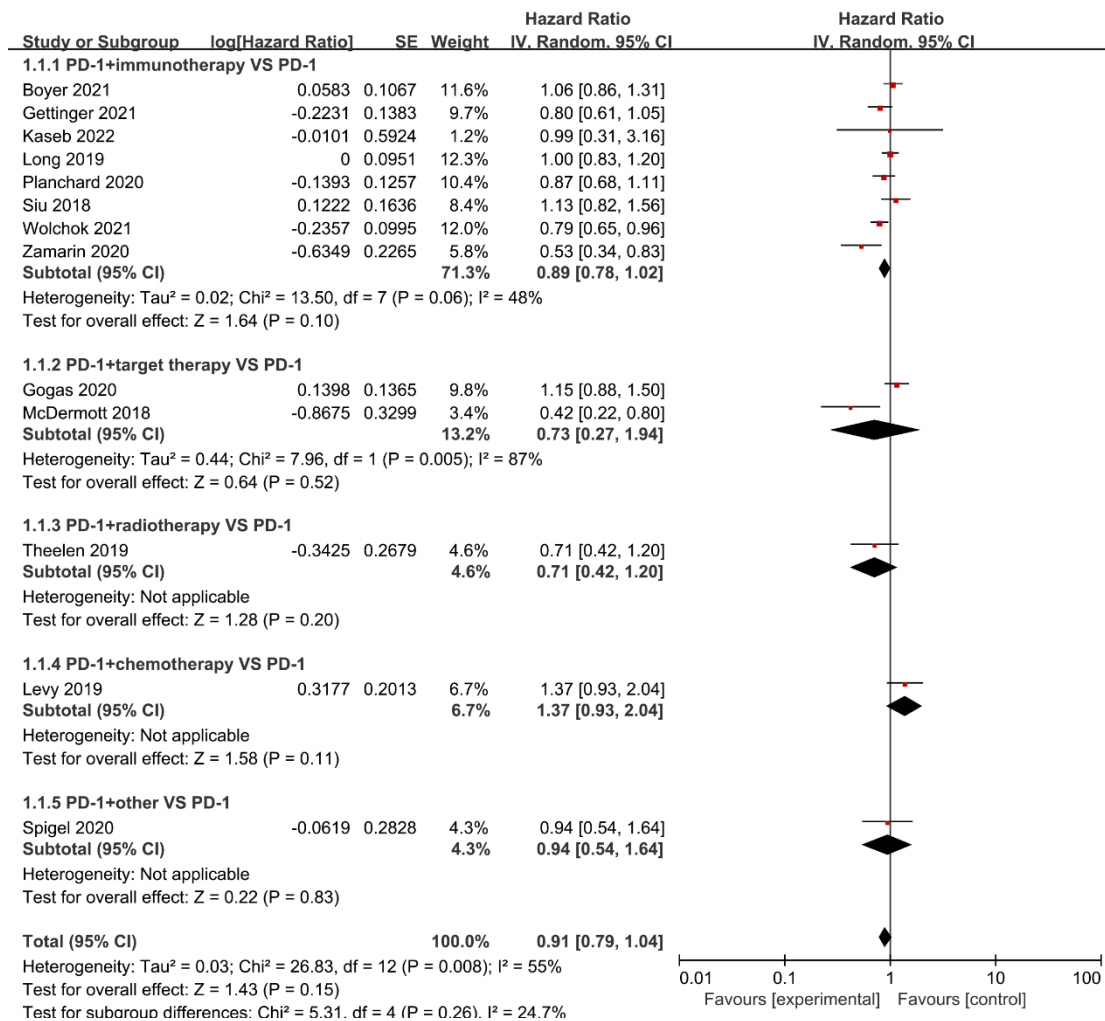

**Figure S6** Forest Plot of the Hazard ratio of PFS based on therapeutic schedules: anti-PD-1/PD-L1 versus combination therapy (immunotherapy, targeted therapy, radiotherapy, chemotherapy, and other drugs)

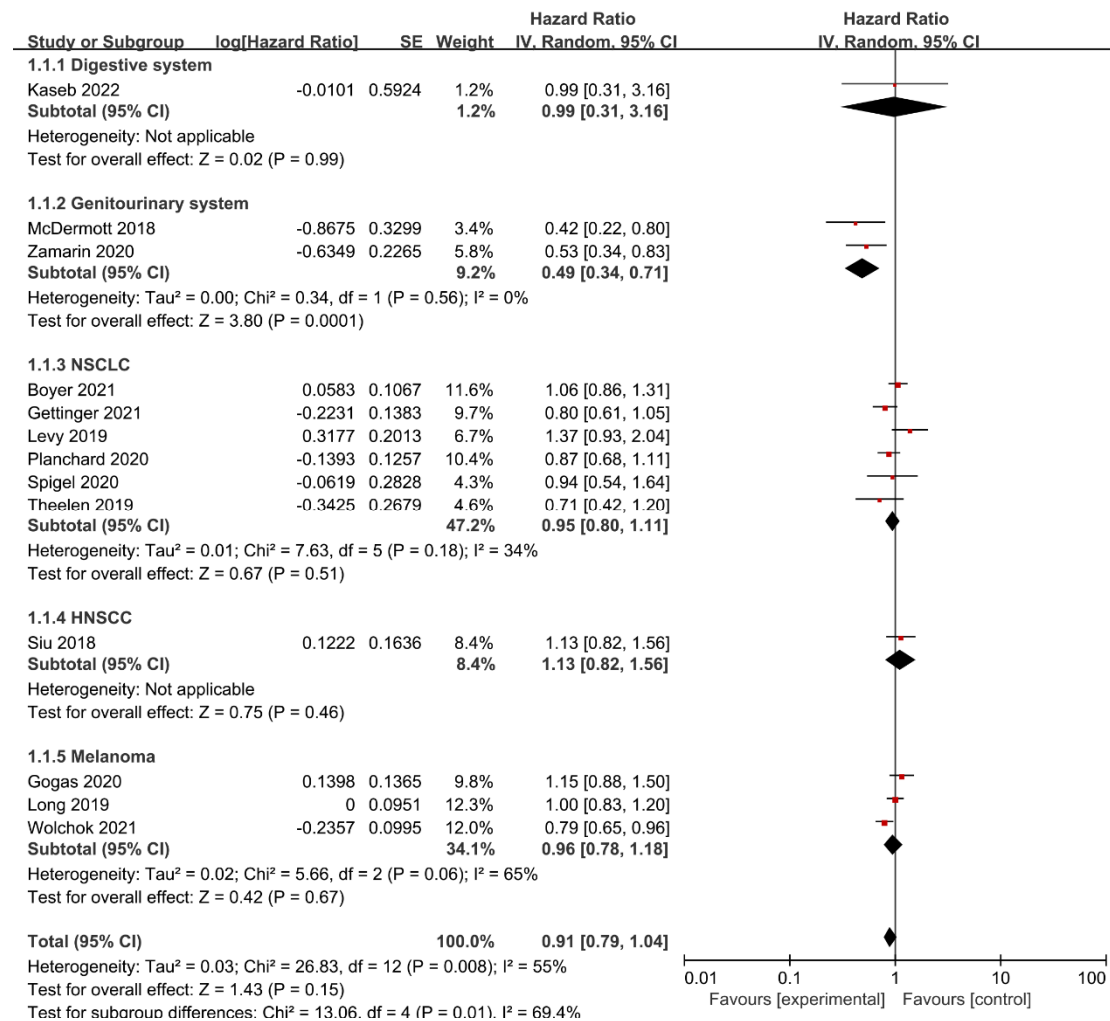

**Figure S7** Forest Plot of the Hazard ratio of PFS based on tumor types: anti-PD-1/PD-L1 versus combination therapy (digestive system tumors, genitourinary system tumors, non-small cell lung cancer, head and neck squamous cell carcinoma, and melanoma)

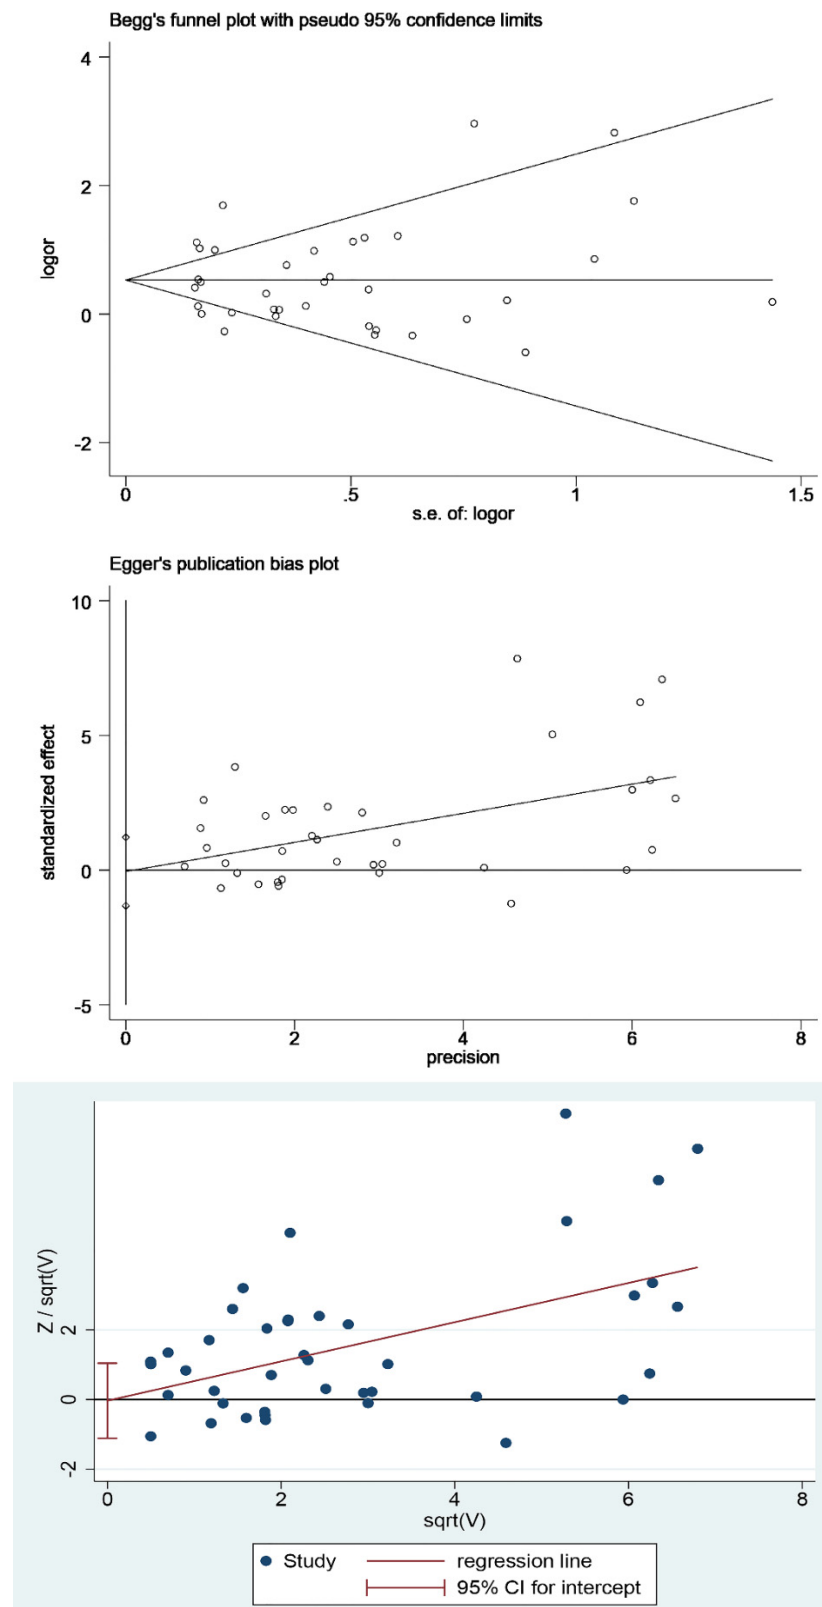

**Figure S8** Begg's test ( $P=0.406$ ), Egger's test ( $P=0.931$ ), and Harbord's test ( $P=0.952$ ) showed no significant publication bias in ORR.

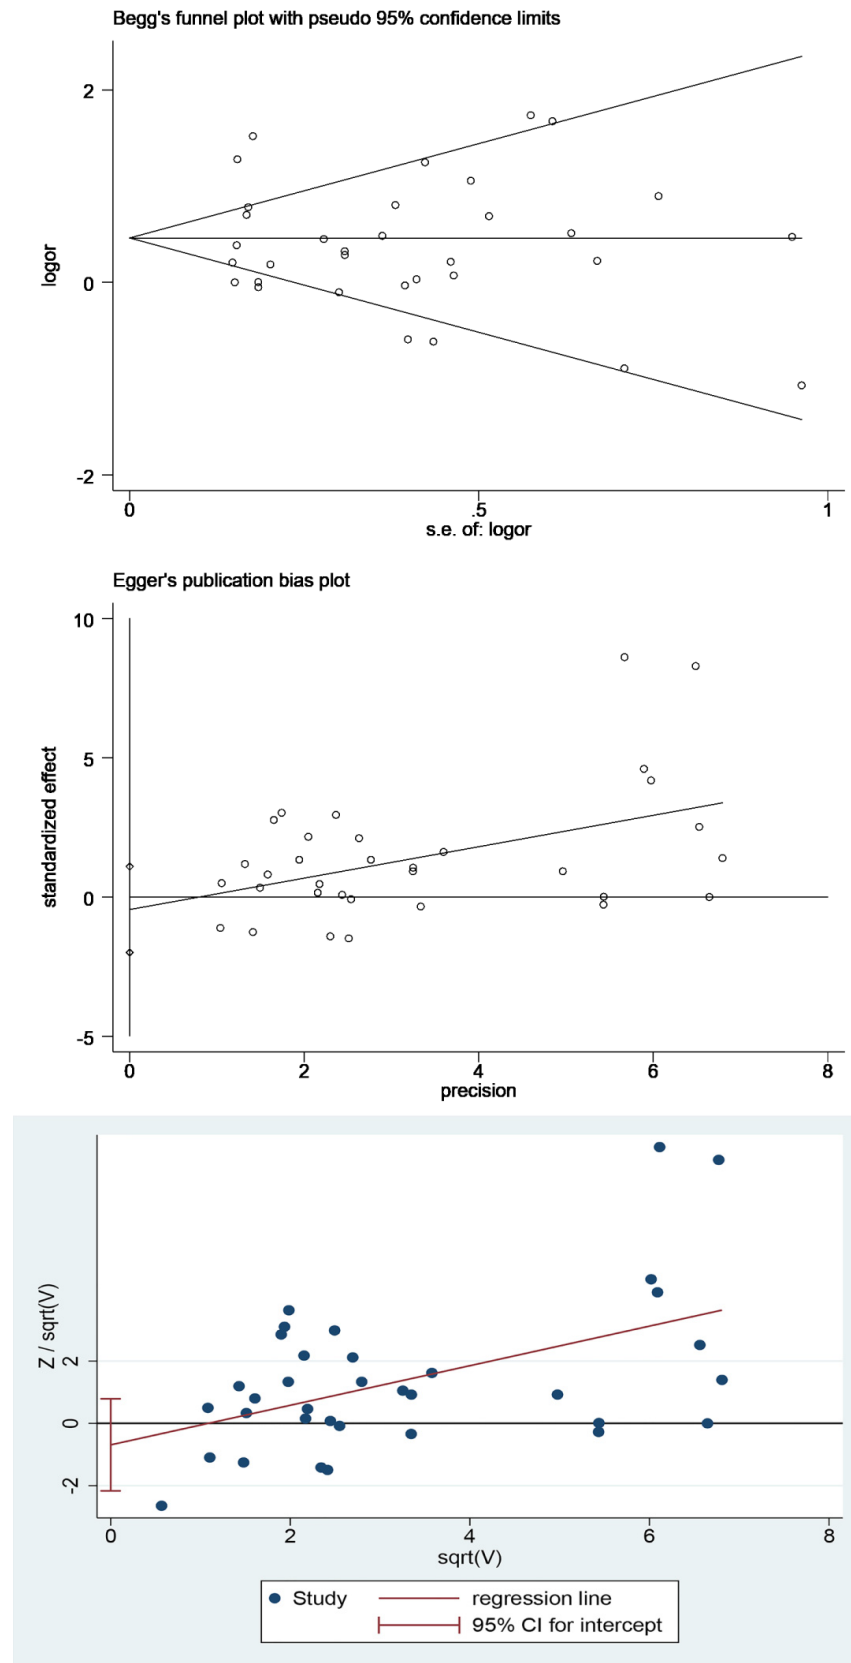

**Figure S9** Begg's test ( $P=0.448$ ), Egger's test ( $P=0.554$ ), and Harbord's test ( $P=0.348$ ) showed no significant publication bias in DCR.

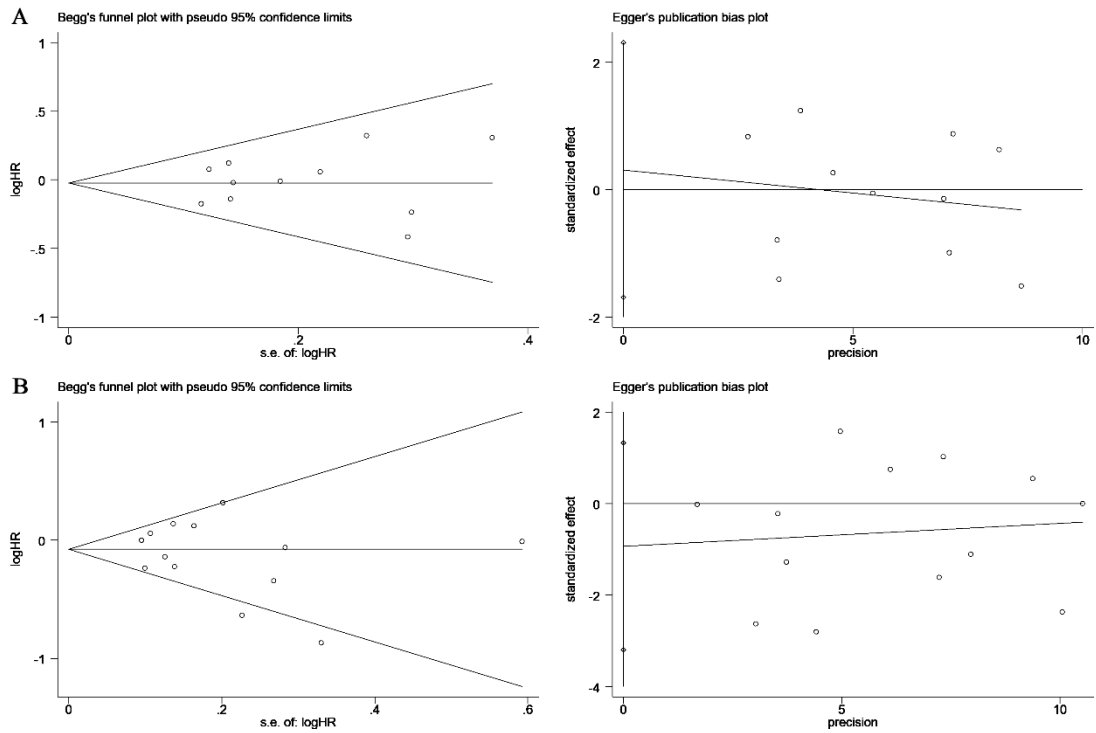

**Figure S10** Begg's test and Egger's test

- (A) Begg's test ( $P=0.533$ ) and Egger's test ( $P=0.735$ ) showed no significant publication bias in Hazard ratio of OS.
- (B) Begg's test ( $P=0.669$ ) and Egger's test ( $P=0.383$ ) showed no significant publication bias in Hazard ratio of PFS.

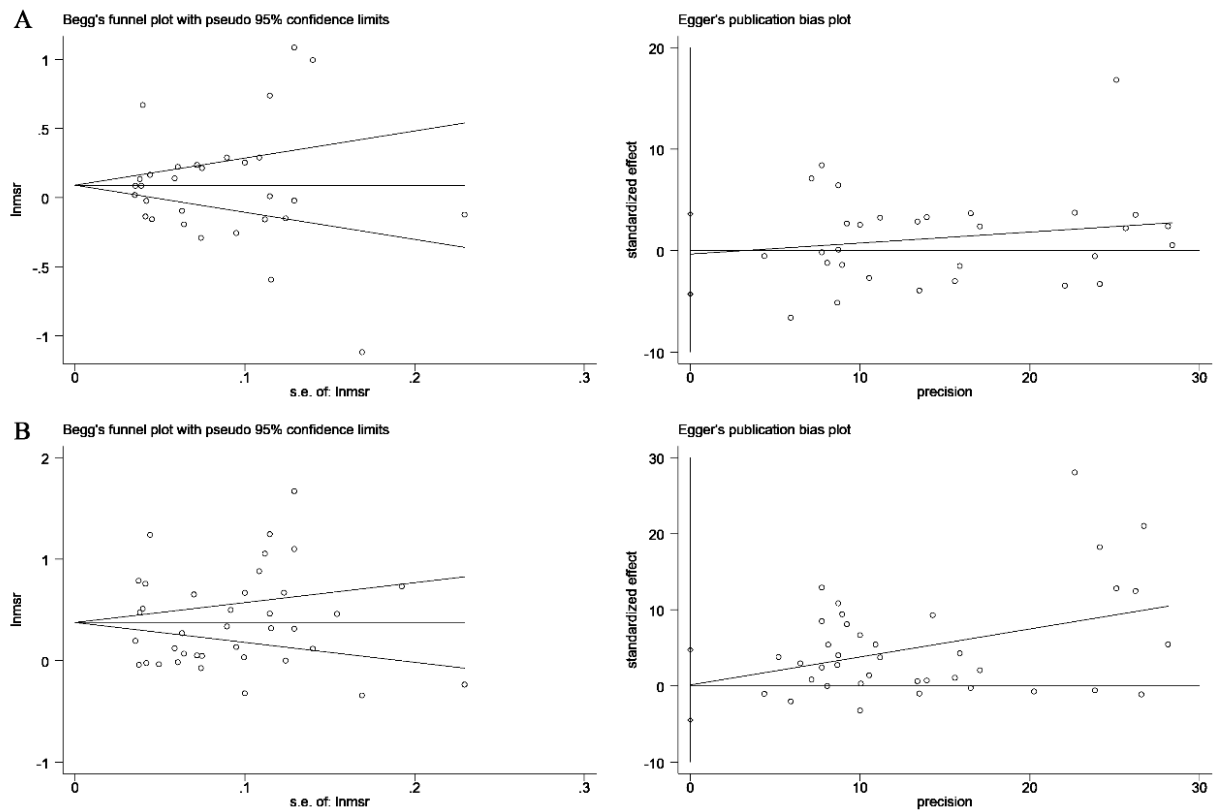

**Figure S11** Begg's test and Egger's test

(A) Begg's test ( $P=0.803$ ) and Egger's test ( $P=0.860$ ) showed no significant publication bias in median OS.

(B) Begg's test ( $P=0.204$ ) and Egger's test ( $P=0.952$ ) showed no significant publication bias in median PFS.
